# Supplementary material for: How and Why Patients Adhere to a Prescribed Cardiac Rehabilitation Program: A Longitudinal Phenomenological Study of Patients with Acute Coronary Syndrome
Source: MDPI journal article supplement (doi:10.3390/ijerph19031482), 2022-01-28
Supplement: s1 [file s1]

**Table S1.** Consolidated criteria for reporting qualitative studies (COREQ): 32-item checklist.

| Item                                           | Description and Page Number                                               |
|------------------------------------------------|---------------------------------------------------------------------------|
| <b>Domain 1: Research team and reflexivity</b> |                                                                           |
| 1. Interviewer/facilitator                     | M.P. (page 4)                                                             |
| 2. Credentials                                 | BSc (page 4)                                                              |
| 3. Occupation                                  | graduate student (page 4)                                                 |
| 4. Gender                                      | female (page 4)                                                           |
| 5. Experience and training                     | trained by PI (N.K.) (page 4)                                             |
| Relationship with participants                 |                                                                           |
| 6. Relationship established                    | no relationship established with participants prior to the study (page 4) |
| 7. Participant knowledge of the interviewer    | professional introductory knowledge (page 4)                              |
| 8. Interviewer characteristics                 | the interviewer is interested in cardiac rehabilitation (page 4)          |
| <b>Domain 2: study design</b>                  |                                                                           |
| Theoretical framework                          |                                                                           |
| 9. Methodological orientation and Theory       | phenomenology (page 2)                                                    |
| Participant Selection                          |                                                                           |
| 10. Sampling                                   | rolling basis (page 3)                                                    |
| 11. Method of approach                         | referral from nurses (page 3)                                             |
| 12. Sample size                                | n = 13 (page 2)                                                           |
| 13. Non-participation setting                  | one participant dropped out before attending the first meeting (page 2)   |
| 14. Setting of data collection                 | cardiac rehabilitation center (page 2)                                    |
| 15. Presence of non-participants               | no one else present (page 2)                                              |
| 16. Description of sample                      | patients with acute coronary syndrome (page 2)                            |
| Data Collection                                |                                                                           |
| 17. Interview guide                            | the authors generated the questions (page 3)                              |
| 18. Repeat interview                           | yes, there were two repeat interviews totaling three interviews (page 3)  |
| 19. Audio/visual recording                     | the researchers used audio recording (page 3)                             |
| 20. Field notes                                | field notes were made during the interviews (page 3)                      |
| 21. Duration                                   | interviews ranged from 15–25 min (page 3)                                 |
| 22. Data Saturation                            | saturation reported (page 3)                                              |
| 23. Transcripts returned                       | transcripts were confirmed (page 3)                                       |
|                                                | transcripts returned (page 3)                                             |
| <b>Domain 3: analysis and findings</b>         |                                                                           |
| Data analysis                                  |                                                                           |
| 24. Number of data coders                      | there were two data coders R.G and M.P (page 4)                           |
| 25. Description of the coding tree             | description of the coding tree (page 2)                                   |
| 26. Derivation of themes                       | themes were derived from the data (page 4)                                |
| 27. Software                                   | NVivo 12 was used (page 4)                                                |
| 28. Participant checking                       | participants did not provide feedback                                     |
| Reporting                                      |                                                                           |
| 29. Quotations presented                       | quotes and participant numbers were provided (Table 2)                    |
| 30. Data and findings consistent               | consistency has been reported (page 4)                                    |
| 31. Clarity of major themes                    | major themes identified (page 4)                                          |
| 32. Clarity of minor themes                    | minor/subthemes identified (page 4)                                       |
